# Supplementary material for: A Randomized, Double-Blind, Placebo-Controlled, Phase 2a Study to Evaluate the Efficacy and Safety of RIST4721 in Subjects with Palmoplantar Pustulosis
Source: Springer Nature journal article supplement (doi:10.1007/s13555-021-00632-7), 2021-10-30
Supplement: MOESM2 [file 19813916]

**A Randomized, Double-Blind, Placebo-Controlled, Phase 2a Study to Evaluate the Efficacy and Safety of RIST4721 in Subjects with Palmoplantar Pustulosis**

| Authors | Robert Bissonnette1, Catherine Maari1, Athanasios Tsianakas2, DeAnne Reid3, Sara McCutchan3, Scott Baumgartner3, James Mackay3, Nihar Bhakta3 |
| --- | --- |
| Institutions | 1Innovaderm Research Inc., Montreal, Quebec, Canada; 2Fachklinik Bad Bentheim, Bad Bentheim, Germany; 3Aristea Therapeutics, Inc., San Diego, California, United States of America |
| Corresponding Author | Robert Bissonnette, MD, FRCPC  rbissonnette@innovaderm.com |

Table 1: List of Institutional Review Boards and Independent Ethics Committees Consulted During Study RIST4721-201

| IRB/IEC | Site Number(s) |
| --- | --- |
| **Central IRB (Canada)** | |
| Advarra® | 01, 02, 03, 05, 06, 07, 08, 10, 12 |
| **Local IRB (Canada)** | |
| Health Research Ethics Board of Alberta Clinical Trials Committee | 04, 09, 11 |
| **Central Ethics Committee (Germany)** | |
| Ethik-Kommission bei der Ärztekammer Niedersachsen | 13 |
| **Local Ethics Committees (Germany)** | |
| Landesamt für Gesundheit und Soziales Berlin Geshäftsstelle der Ethik-Kommission des Landes Berlin | 14 |
| Ethik-Kommission der Ärztekammer Hamburg | 15 |
| Ethik-Kommission der Ärztekammer Westfalen-Lippe und der Westfälischen Wilhelms-Universität Münster | 16 |
| Ethik-Kommission der Bayerischen Landesärztekammer | 17 |

Abbreviations: IEC, Independent Ethics Committee; IRB, Institutional Review Board
